# Supplementary material for: Lysosomal Sequestration Impairs the Activity of the Preclinical FGFR Inhibitor PD173074
Source: Cells. 2018 Dec 8;7(12):259. doi: 10.3390/cells7120259 (PMC6315953; doi:10.3390/cells7120259)
Supplement: Supplementary file 1 [file cells-07-00259-s001.pdf]

Supplementary figures and figure legends

Figure S5

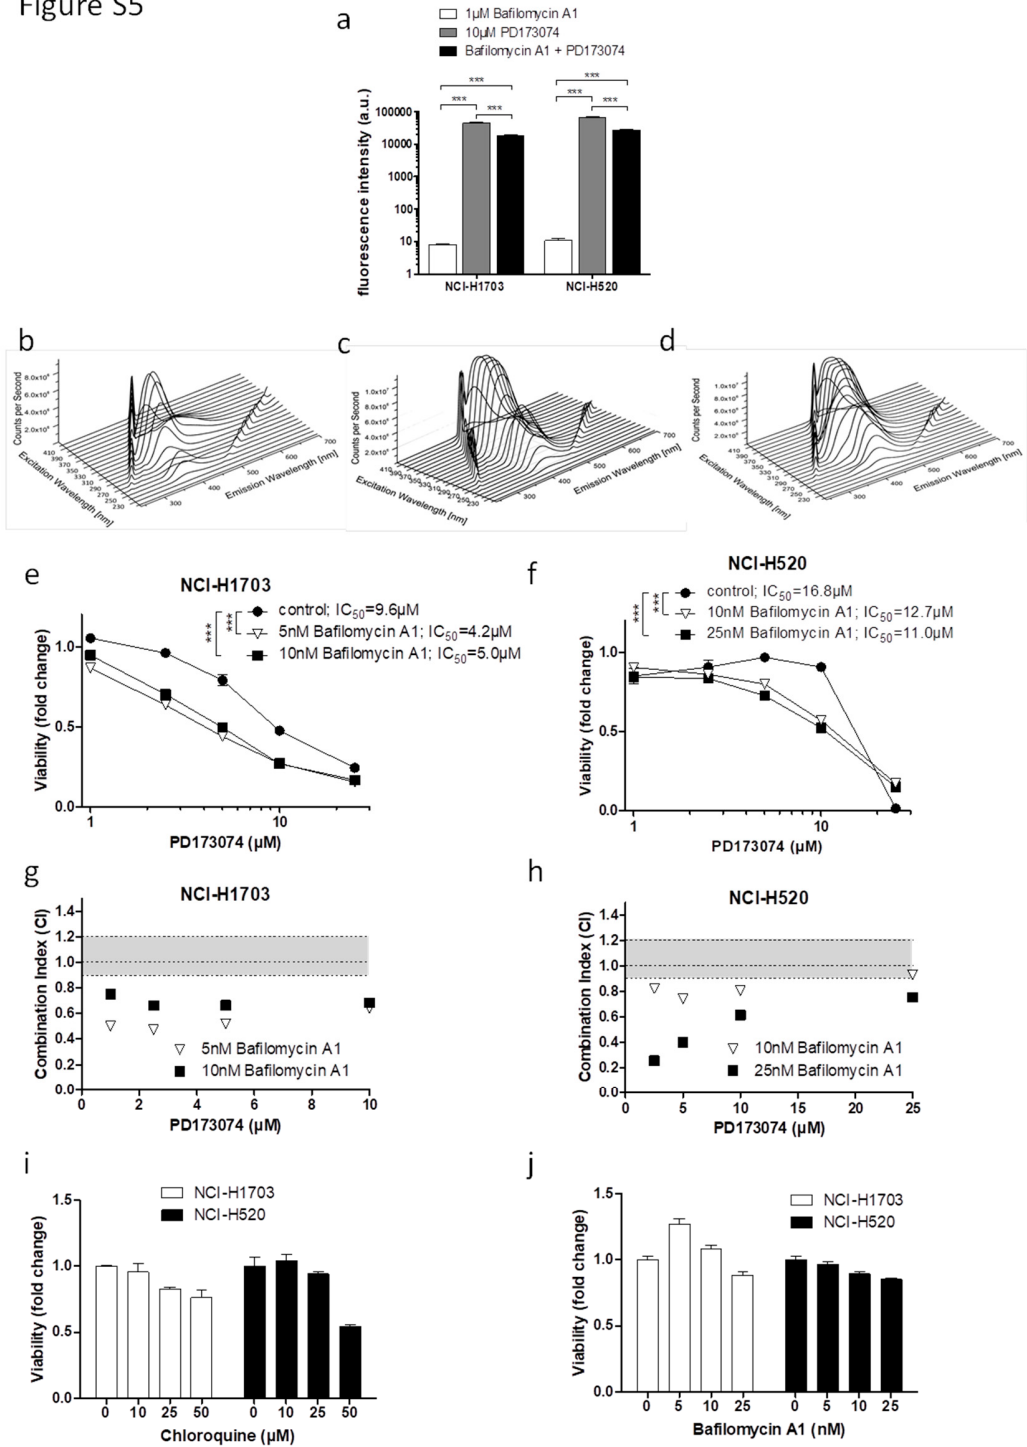

**Figure S1. Fluorescence-based *in vitro* and cell-free detection of PD173074.** (a) Intracellular fluorescence of NCI-H520 cells, treated for 1 h with 10  $\mu$ M PD173074 was determined by flow cytometry. Fluorescence emission was detected using DAPI (450/40 nm), Horizon V450 (450/40 nm), FITC (530/30 nm) and APC (660/20 nm) emission channels for the 355 nm, 405 nm, 488 and 640 nm lasers, respectively. \*\*\* $p < 0.001$ , student's t-test. (b) Accumulation of indicated PD173074 concentrations in NCI-H520 cells was measured over time by flow cytometry using the 405 nm laser and the Horizon V450 (450/40 nm) emission filter. \*\*\* $p < 0.001$ , two-way ANOVA, Bonferroni post-test. (c) A 3-dimensional, full-range excitation-emission spectrum was generated by fluorescence spectroscopy to analyze cell-free fluorescence properties of PD173074 at pH 4,5,6 (diluted in 1% DMSO/citrate buffer) and 7.4 (diluted in 1% DMSO/PBS). Excitation wavelengths ranged from 220 nm to 420 nm, emission spectra were recorded from 250 nm to 700 nm. Diagonal ridges indicate Raleigh scatters of first and second order. (d) Intracellular PD173074 distribution in VL-2 and BEAS-2B cells, exposed to 10  $\mu$ M of the drug for 1 h was investigated by confocal microscopy using the DAPI channel. Lysosomes were stained with LysoTracker Red®. The scale bar indicates 10  $\mu$ m. (e) Accumulation of indicated PD173074 concentrations in NCI-H1703 cells preincubated–or not–with 20  $\mu$ M CPZ was measured over time by flow cytometry using the 405 nm laser and the Horizon V450 (450/40 nm) emission filter. \*\*\* $p < 0.001$ , two-way ANOVA, Bonferroni post-test. ns, non-significant;

Figure S2

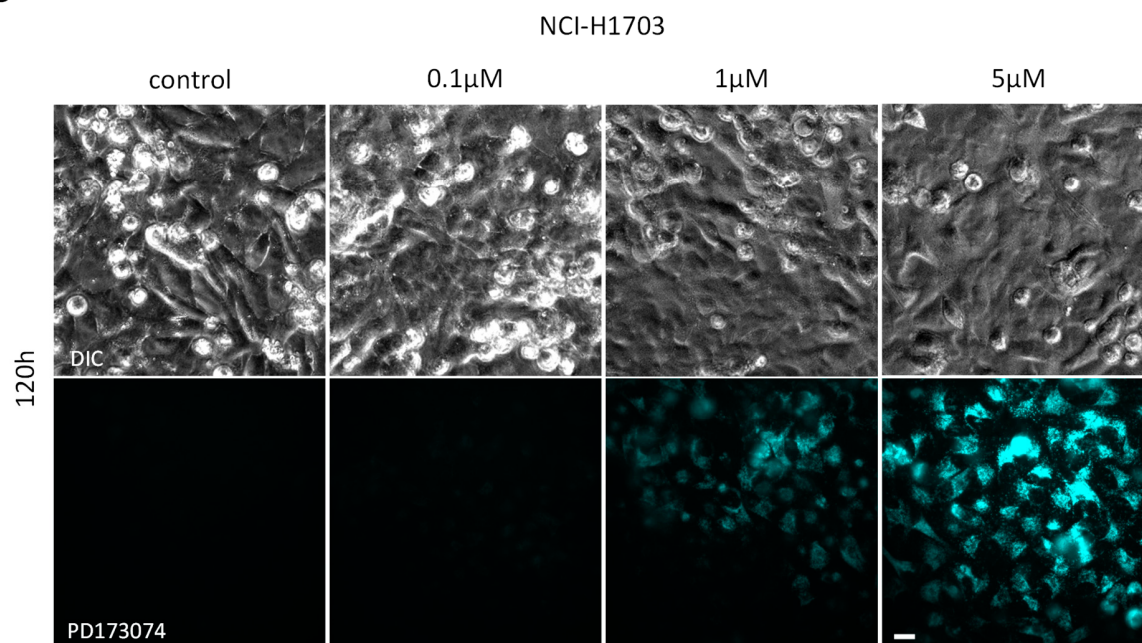

**Figure S2. Lysosomal localization of PD173074 remains stable over several days.** PD173074 retention in lysosomes of NCI-H1703 cells was analyzed by live cell microscopy. Cells were treated for 1 h with indicated concentrations of PD173074, followed by incubation in drug-free media. PD173074 was imaged using the DAPI channel and is pseudocolored in cyan. The scale bar indicates 10  $\mu\text{m}$ .

Figure S3

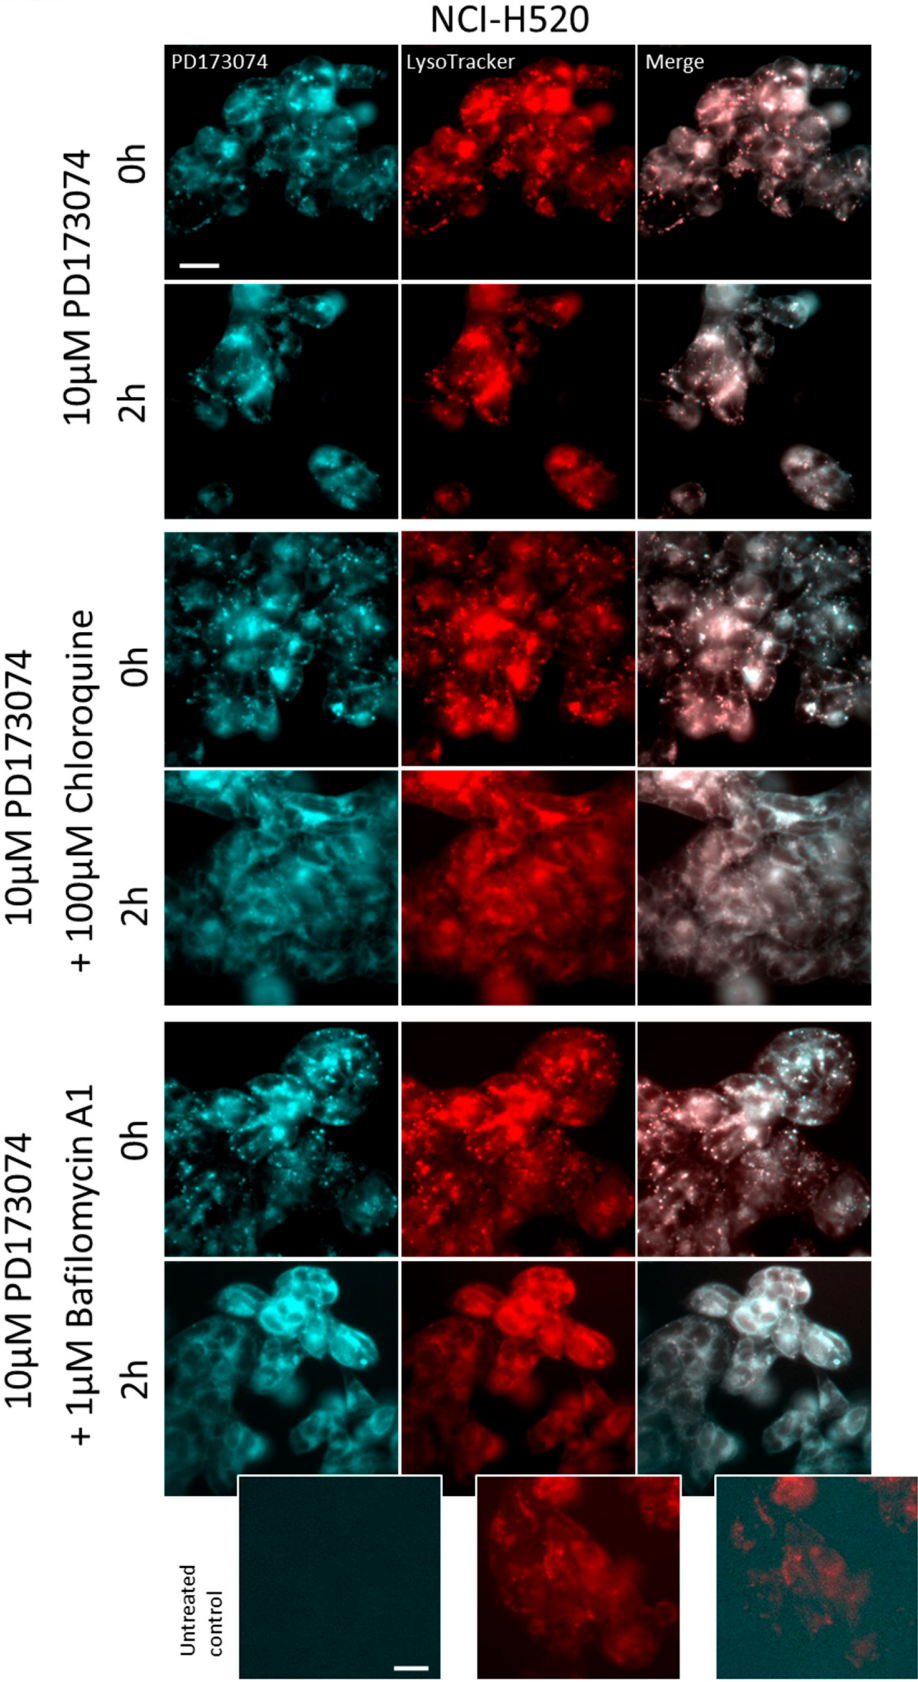

**Figure S3. Lysosomal de-acidification reduces PD173074 accumulation in lysosomes.** Effect of 2 h coincubation with 100  $\mu$ M chloroquine or with 1  $\mu$ M bafilomycin A1 on subcellular distribution of PD173074 (10  $\mu$ M) in NCI-H520 cells was analyzed by live cell microscopy. LysoTracker Red® was used to stain lysosomes. The scale bar indicates 10  $\mu$ m.

Figure S4

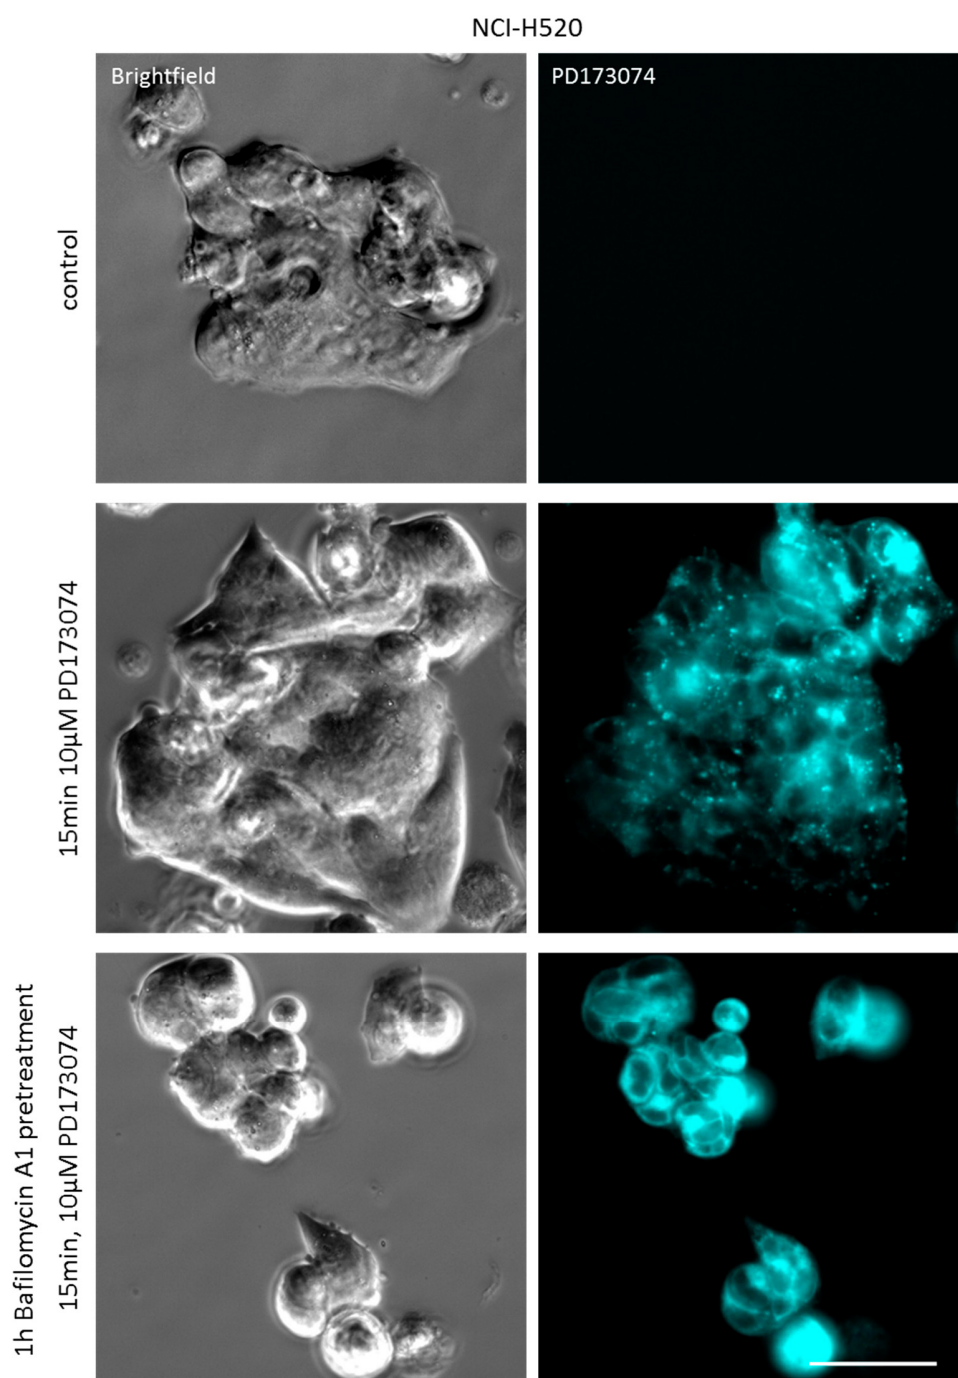

**Figure S4. Bafilomycin A1 pretreatment prevents lysosomal PD173074 sequestration.** Effect of 1 h preincubation with 1  $\mu$ M bafilomycin A1 on subcellular distribution of PD173074 (10  $\mu$ M) in NCI-H520 cells was analyzed 15 min after drug exposure by live cell microscopy. The scale bar indicates 10  $\mu$ m.

Figure S5

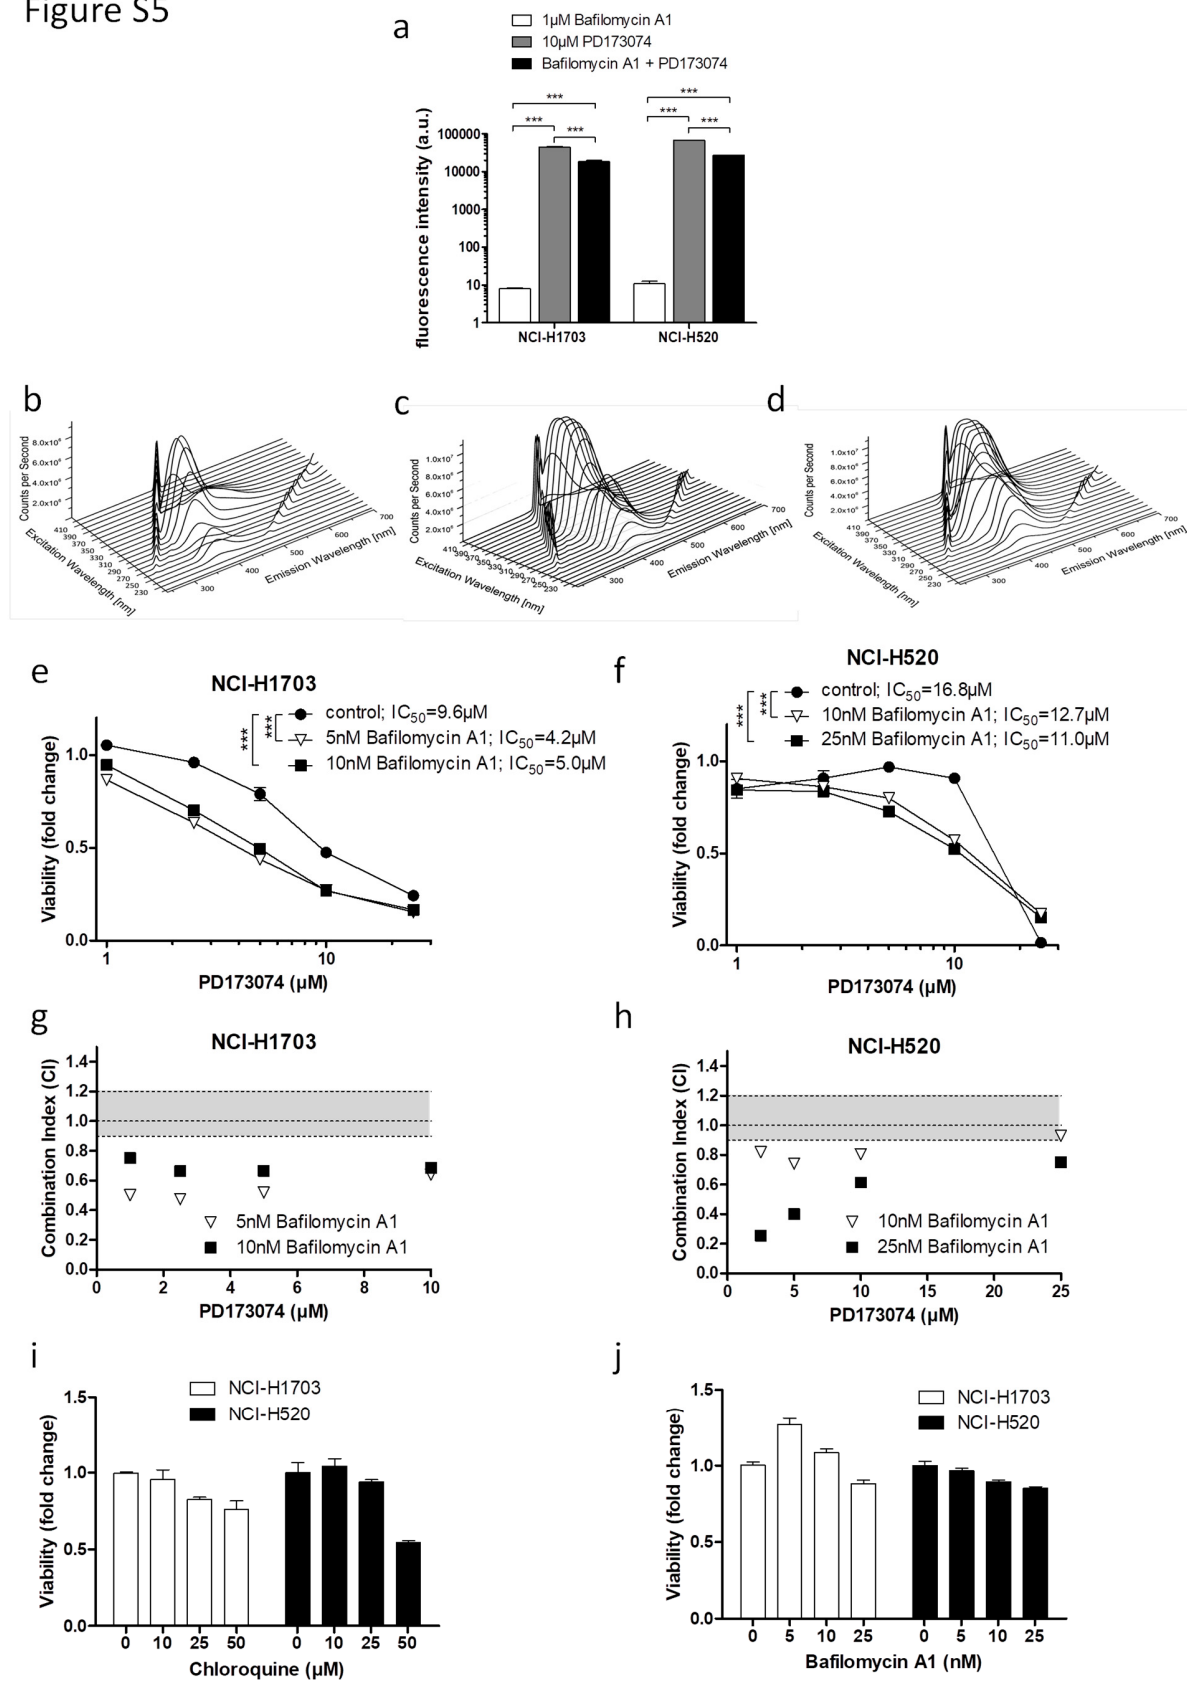

**Figure S5. Lysosomal alkalization increases the cytotoxic potential of PD173074.** **(a).** Impact of 1 h coincubation of 1  $\mu$ M bafilomycin A1 on intracellular accumulation of PD173074 (10  $\mu$ M) in NCI-H1703 and NCI-H520 cells was determined by flow cytometry using the 405 nm laser and the Horizon V450 (450/40 nm) emission filter. \*\*\* $p$ <0.001, two-way ANOVA, Bonferroni post-test. **(b-d)** A 3-dimensional, full-range excitation-emission spectrum was generated by fluorescence spectroscopy to analyze cell-free fluorescence properties of 15  $\mu$ M chloroquine (b) and combination of 15  $\mu$ M PD173074 in combination with 1  $\mu$ M bafilomycin A1 (c) or 15  $\mu$ M chloroquine (d) at pH 7.4 (diluted in 1% DMSO/PBS). Excitation wavelengths ranged from 220 nm to 420 nm, emission spectra were recorded from 250 nm to 700 nm. Diagonal ridges indicate Rayleigh scatters of first and second order. **(e)** Impact of 5 nM and 10 nM bafilomycin A1 on viability of NCI-H1703 cells cotreated for 72 h with rising concentrations of PD173074 was determined by MTT assay. \*\*\* $p$ <0.001, two-way ANOVA, Bonferroni post-test. **(f)** Impact of 10 nM and 25 nM bafilomycin A1 on viability of NCI-H520 cells cotreated for 72 h with rising concentrations of PD173074 was determined by MTT assay. \*\*\* $p$ <0.001, two-way ANOVA, Bonferroni post-test. **(g, h)** Synergism of PD173074 and bafilomycin A1 in NCI-H1703 (g) and NCI-H520 (h) cells was evaluated calculating CalcuSyn combination indices (CI). CI values above 1.2, between 0.9 - 1.2 and below 0.9 indicated antagonism, additivity, and synergism, respectively. **(i)** Impact of indicated concentrations of chloroquine on viability of NCI-H1703 and NCI-H520 cells was determined by MTT viability assay after 72 h drug exposure. **(j)** Impact of indicated concentrations of bafilomycin A1 on viability of NCI-H1703 and NCI-H520 cells was determined by MTT viability assay after 72 h drug exposure.
